# Supplementary material for: The soluble glutathione transferase superfamily: role of Mu class in triclabendazole sulphoxide challenge in Fasciola hepatica
Source: PubMed Central journal article supplement (PMC7889535; doi:10.1007/s00436-021-07055-5), 2021-01-27
Supplement: 436_2021_7055_MOESM1_ESM.pdf [file 436_2021_7055_MOESM1_ESM.pdf]

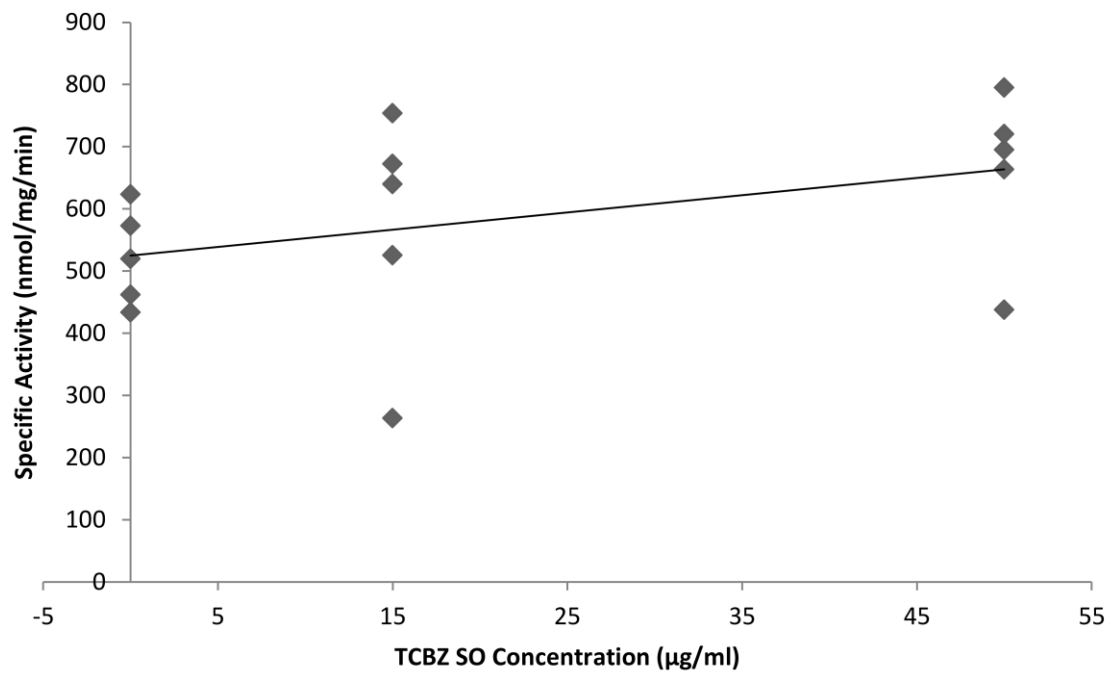

**Online Resource 1** Glutathione transferase specific activity (nmol/mg/min) assessed with the model substrate CDNB for *F. hepatica* cytosolic samples for each TCBZ-SO treatment. Treatment groups, control, sub-lethal, and lethal, contained adult fluke that were exposed to TCBZ-SO at 0, 15 and 50 µg/ml respectively
