# Supplementary material for: The soluble glutathione transferase superfamily: role of Mu class in triclabendazole sulphoxide challenge in Fasciola hepatica
Source: PubMed Central journal article supplement (PMC7889535; doi:10.1007/s00436-021-07055-5), 2021-01-27
Supplement: 436_2021_7055_MOESM4_ESM.pdf [file 436_2021_7055_MOESM4_ESM.pdf]

**Online Resource 4** Transcript support for the newly identified FhGST-S2 and FhGST-O1. BLAST hits following analysis of databases using FhGST-S1, -S2, -O1 and -O2 are provided. Top scoring hits are shaded in grey. Transcripts were retrieved from <sup>A</sup>Young *et al.* (2011), <sup>B</sup>Young *et al.* (2010), <sup>C</sup>an in house *F. gigantica* newly excysted juvenile transcriptome, <sup>D</sup>the available EBI-ENA archive ERP000012: an initial characterization of the *F. hepatica* transcriptome using 454-FLX sequencing and <sup>E</sup>from *F. hepatica* ESTs available by anonymous FTP from the Wellcome Trust Sanger Institute <ftp://ftp.sanger.ac.uk/pub/pathogens/Fasciola/>

| Sigma Class GSTs              | GST-S1       | GST-S2       |
|-------------------------------|--------------|--------------|
|                               | Scaffold1081 | Scaffold1104 |
| Contig24647 <sup>A</sup>      | 1.00E-33     | 6.00E-17     |
| Contig27045 <sup>A</sup>      | 2.00E-10     | -            |
| Fh_Contig8894 <sup>B</sup>    | 4.00E-50     | 5.00E-24     |
| isotig05100 <sup>C</sup>      | 8.00E-50     | 2.00E-23     |
| isotig05101 <sup>C</sup>      | 8.00E-50     | 2.00E-23     |
| isotig04409 <sup>C</sup>      | 6.00E-14     | 5.00E-50     |
| contig07874 <sup>D</sup>      | 6.00E-50     | 1.00E-23     |
| contig06001 <sup>D</sup>      | 7.00E-14     | 6.00E-50     |
| Omega Class GSTs              | GST-O1       | GST-O2       |
|                               | Scaffold1029 | Scaffold50   |
| contig03575 <sup>D</sup>      | 3.00E-11     | 2.00E-45     |
| contig04426 <sup>D</sup>      | 2.00E-45     | 2.00E-11     |
| HAN5016c12.q1kT3 <sup>E</sup> | 5.00E-04     | 5.00E-24     |
| isotig09504 <sup>C</sup>      | 1.00E-10     | 3.00E-44     |
| isotig10825 <sup>C</sup>      | 1.00E-42     | 9.00E-12     |
| Contig20835 <sup>A</sup>      | 1.00E-10     | 3.00E-44     |
| Contig13488 <sup>A</sup>      | 5.00E-35     | 4.00E-09     |
| Contig12260 <sup>A</sup>      | 3.00E-43     | 2.00E-12     |
| Fh_Contig5261 <sup>B</sup>    | 2.00E-45     | 2.00E-11     |
| Fh_Contig2859 <sup>B</sup>    | 6.00E-11     | 1.00E-44     |
